# Supplementary material for: Evaluation of Hospital Antimicrobial Stewardship Programs: Implementation, Process, Impact, and Outcomes, Review of Systematic Reviews
Source: MDPI journal article supplement (doi:10.3390/antibiotics13030253), 2024-03-12
Supplement: s1 [file s1]

**Study : Evaluation of Hospital Antimicrobial Stewardship Programs: Implementation, process, impact, and outcomes, review of systematic reviews**

Supplement S1 : Outlines of the review protocol

**Search period** : 28/08/2022 for the preceding 10 years.

**Search engines** : Five major databases were searched: OVID-Medline, PubMed, Embase, Cochrane, and Google Scholar.

| <b>Stem</b>                                       | <b>AND</b>                                                            | <b>OR</b>                                                                            |
|---------------------------------------------------|-----------------------------------------------------------------------|--------------------------------------------------------------------------------------|
| Antimicrobial Stewardship Programs<br>AMSP<br>ASP | Secondary care/ Tertiary care<br>Hospital                             | Healthcare                                                                           |
| Antimicrobial consumption<br>Antibiotics          | Secondary care / Tertiary care<br>Hospital                            | Tertiary care<br>DDD                                                                 |
| Major ASP Concepts                                | Process<br>Efficacy<br>AMR<br>Economic / Cost effectiveness<br>Safety | Outcome<br>Effectiveness/efficiency<br>Resistance<br>Impact/burden<br>Adverse events |
| Boolean MeSH variations                           | Antibio*Antimicrob*<br>Steward*<br>ASP*<br>AMSP*<br>AMR*<br>Effic*    | Hosp*Hos*<br>Secondary care / Tertiary care                                          |

**Inclusion and exclusion criteria**

| <b>Stem</b>       | <b>Inclusion</b>                                                       | <b>Exclusion</b>                                                                            |
|-------------------|------------------------------------------------------------------------|---------------------------------------------------------------------------------------------|
| Types of studies  | Systematic reviews using PRISMA methodology                            | Non-congruent systematic methodology<br>Reviews<br>Scoping reviews                          |
| Publication types | Papers published in peer reviewed journals or open access publications | Non peer reviewed articles<br>Policies and guidelines<br>Editorials<br>Letters and comments |
| Research results  | Any implementation processes.<br>Any impact<br>Any outcome measures    | No available outcomes                                                                       |
| Settings          | Hospital based : Secondary care /tertiary care                         | Primary care<br>Ambulatory care<br>Long-term facilities / Nursing homes                     |
| Age               | No age restrictions                                                    | Nil                                                                                         |
| Gender            | All included                                                           | Nil                                                                                         |
| Countries         | Regions or global                                                      | Singular countries                                                                          |
| Pathogens         | Groups / families of pathogens                                         | Singular pathogens<br>Reporting COVID pandemic related outcomes                             |
| Species           | Humans                                                                 | Other species                                                                               |
| Language          | All languages                                                          | Nil                                                                                         |
